# Supplementary material
Source: PubMed Central journal article supplement (PMC4248947)
Supplement: JVI.01896-14_zjv999099656so1.pdf [file JVI.01896-14_zjv999099656so1.pdf]

- 1 **Supplementary Table 1.** Molar ratios of lipids utilized in preparation of liposomes  
2 mimicking cellular compartments (21)

| <b>Liposomes</b>                           | <b>Mammalian plasma membrane</b> | <b>Late Endosome</b> | <b>Endoplasmic raticulum</b> | <b>Golgi body</b> |
|--------------------------------------------|----------------------------------|----------------------|------------------------------|-------------------|
| <b>Cholesterol</b>                         | 50                               | 50                   | 15                           | 20                |
| <b>Phosphatidyl Choline</b>                | 20                               | 25                   | 52                           | 50                |
| <b>Phosphatidyl Ethanolamine</b>           | 11                               | 10                   | 30                           | 17                |
| <b>Sphingomyelin</b>                       | 13                               | 5                    | 0                            | 10                |
| <b>Phosphatidyl Serine</b>                 | 6                                | 1                    | 3                            | 3                 |
| <b>Phosphatidyl Glycerol</b>               | 0                                | 0                    | 0                            | 0                 |
| <b>BMP (bis(monoacylglycero)phosphate)</b> | 0                                | 9                    | 0                            | 0                 |

3

4

5

6

7

1 **Supplementary Table 2.** Hydrogen bond interactions obtained from the interaction and  
 2 penetration of HAV VP4 with POPC membrane during the course of three different MD  
 3 simulations.

| <b>(1) N-terminus of VP4 facing towards the membrane</b>    |                 |                                |
|-------------------------------------------------------------|-----------------|--------------------------------|
| <b>Donor</b>                                                | <b>Acceptor</b> | <b>H-bonding occupancy (%)</b> |
| Met1                                                        | POPC162         | 77.57                          |
|                                                             | POPC165         | 69.84                          |
| Arg5                                                        | POPC52          | 48.89                          |
|                                                             | POPC54          | 57.93                          |
|                                                             | POPC58          | 42.48                          |
|                                                             | POPC165         | 50.48                          |
| Asn2                                                        | POPC52          | 68.50                          |
|                                                             | POPC165         | 57.12                          |
| Ser4                                                        | POPC52          | 64.33                          |
| <b>(2) C-terminus of VP4 facing towards the membrane</b>    |                 |                                |
| Ile8                                                        | POPC232         | 22.83                          |
| Ser4                                                        | POPC175         | 28.12                          |
| Arg5                                                        | POPC94          | 42.96                          |
| <b>(3) VP4 oriented and placed parallel to the membrane</b> |                 |                                |
| Met1                                                        | POPC58          | 66.25                          |
|                                                             | POPC161         | 43.63                          |
| Asn2                                                        | POPC58          | 73.68                          |
| Arg5                                                        | POPC52          | 59.71                          |
|                                                             | POPC54          | 67.51                          |
|                                                             | POPC165         | 55.32                          |
|                                                             |                 |                                |

4

5

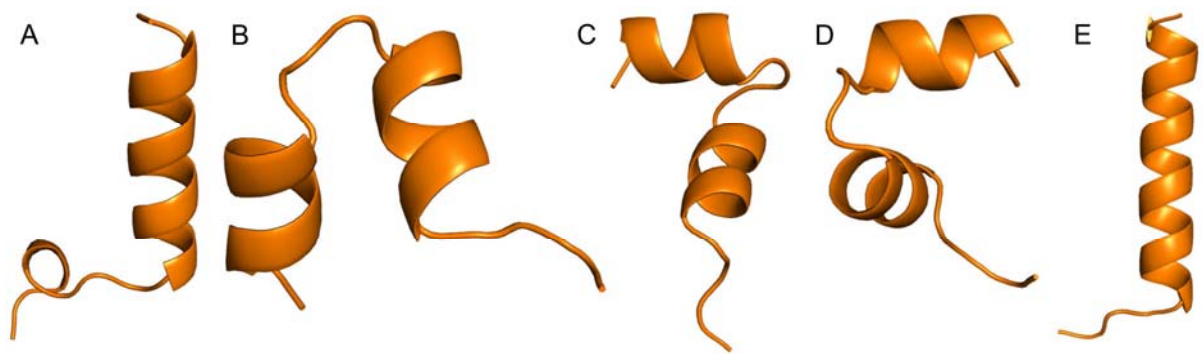

1

2 **Supplementary Figure 1:** Predicted 3D structure snapshots, from (A) to (E), of HAV VP4  
3 from Bhageerath-H. The total energy obtained for (A-E) are (-342.958 kcal/mol, -328.128  
4 kcal/mol, -327.623 kcal/mol, -308.649 kcal/mol, -307.647 kcal/mol) respectively. The lowest  
5 energy structure shown in panel-A was used for the MD simulations.

6

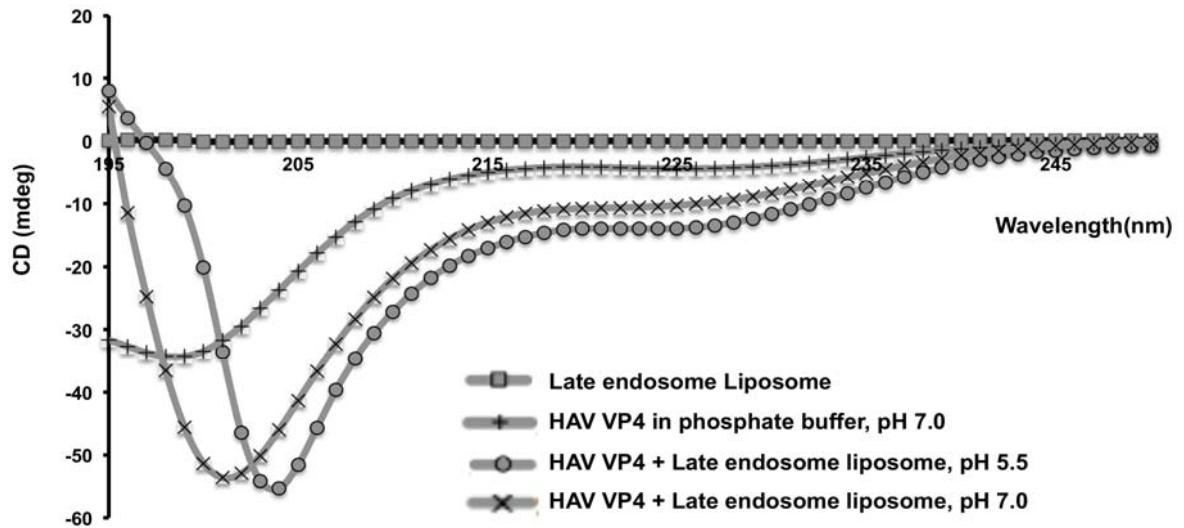

1

2 **Supplementary Figure 2:** Circular Dichroism spectroscopy of 50  $\mu$ M HAV VP4 in presence  
 3 of liposomes mimicking late endosomal vesicles, at pH 7.0 or pH 5.5.

4

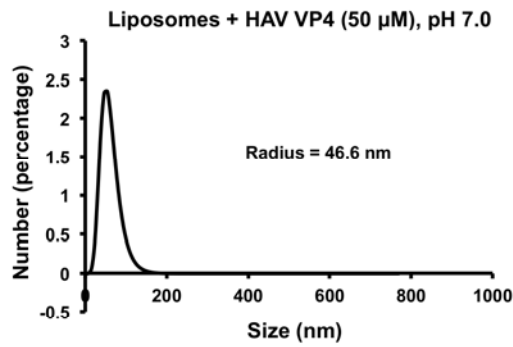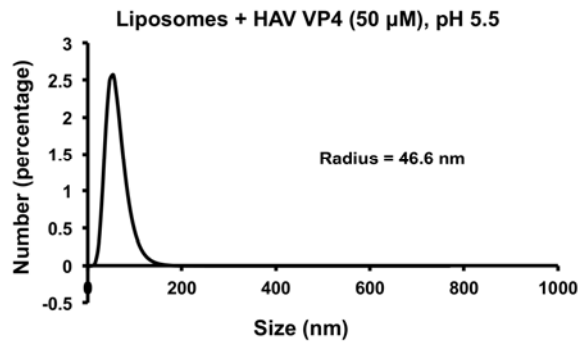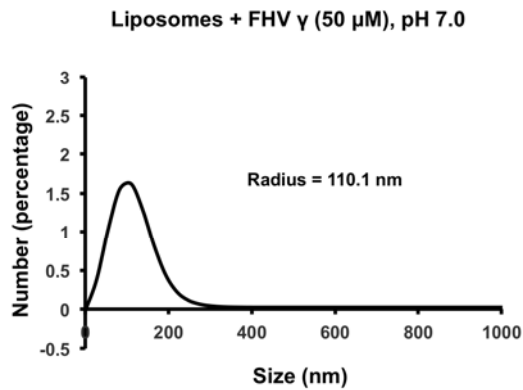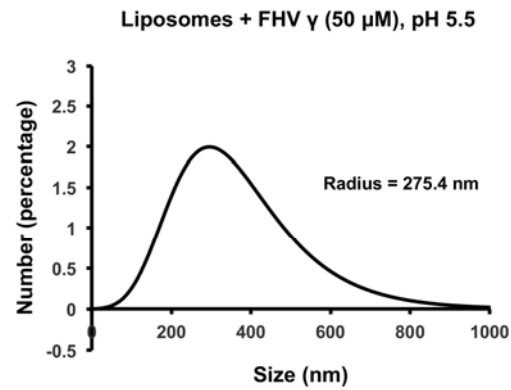

1

2 **Supplementary Figure 3:** Dynamic light scattering studies, showing the mean  
 3 hydrodynamic radius or  $R_h(\text{mean})$  of liposomes mimicking late endosomal compartments,  
 4 after 20 minutes of incubation with 50  $\mu$ M of HAV VP4 or FHV  $\gamma$ 1, at pH 7.0 and 5.5.

5

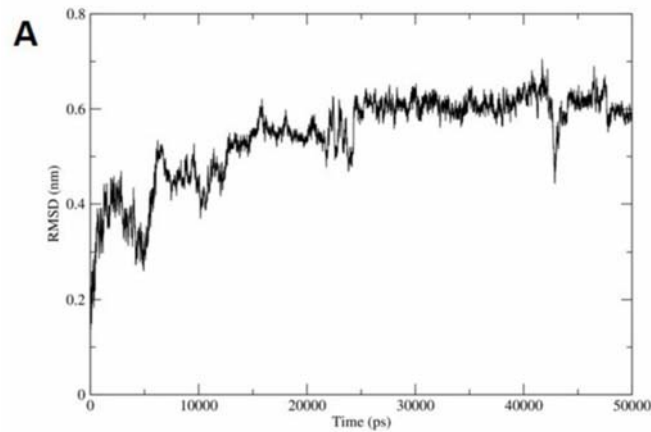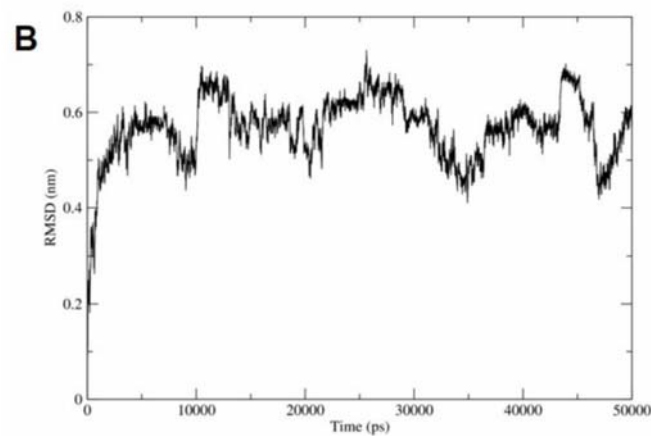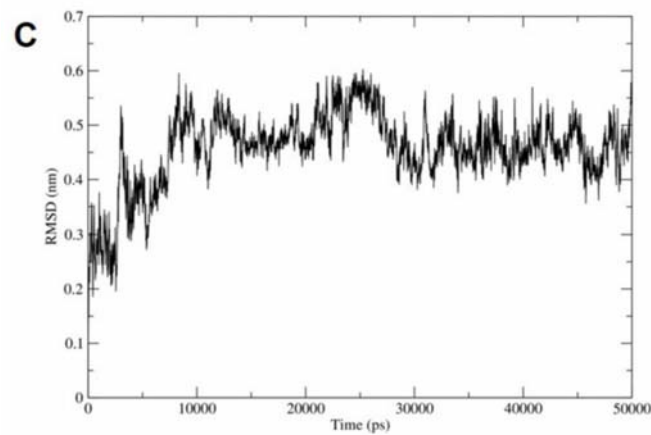

1

2 **Supplementary Figure 4:** Root mean square deviation (RMSD) of the C $\alpha$  backbones of VP4  
 3 referring to the starting structure as a function of simulation time. (A) A stable backbone  
 4 RMSD of VP4 obtained from the simulation when the N-terminus of the peptide oriented and  
 5 placed towards the membrane surface (B) Unstable backbone RMSD observed when the C-  
 6 terminus of the peptide placed towards the membrane and (C) a stable RMSD of the C $\alpha$   
 7 backbone of VP4 when it is placed parallel to the membrane.

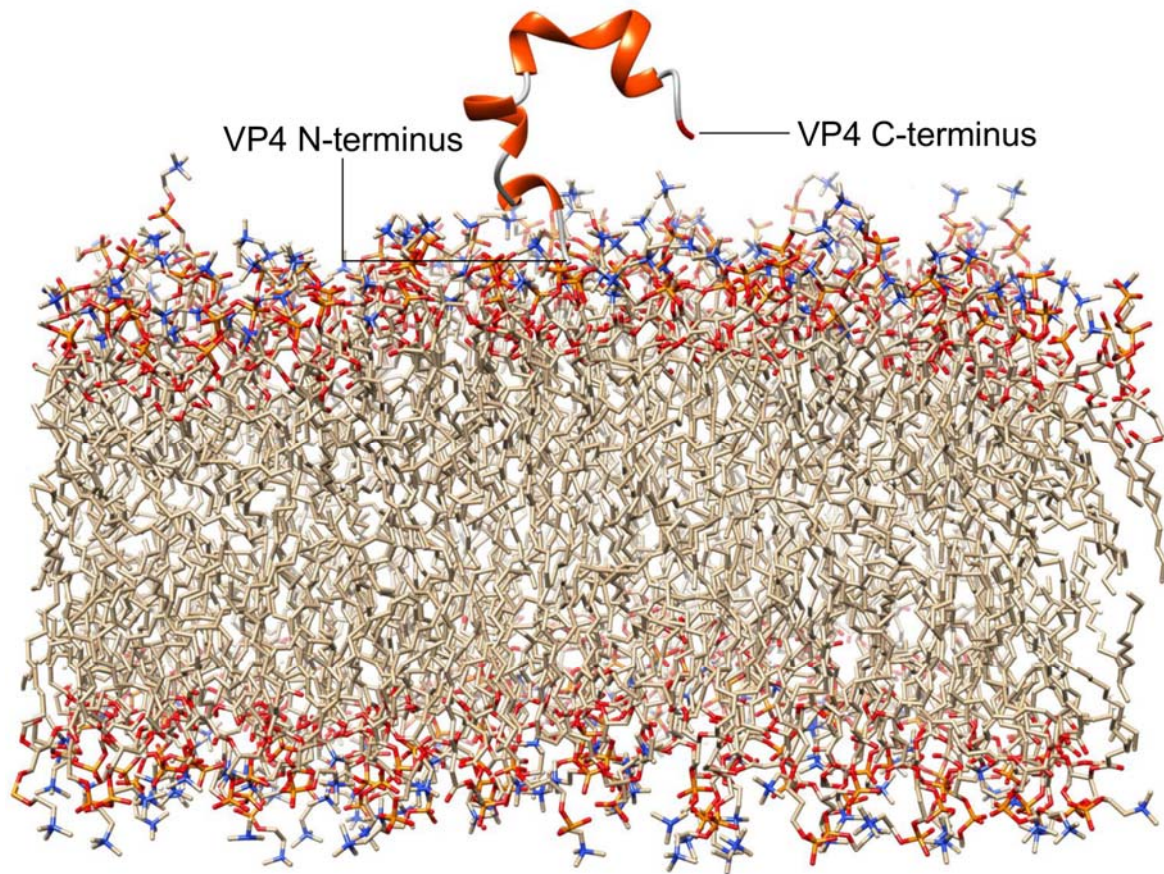

1

2 **Supplementary Figure 5:** Snapshot of VP4 showing a circular ring like structure (N- and C-  
3 termini approaching close to each other) with respect to the membrane surface obtained from  
4 the simulation. The C-terminal  $\alpha$ -helical domain appears to be conserved, which may help in  
5 providing stability to the peptide while the N-terminus region is showing to interact and  
6 penetrate with the membrane.
